# Supplementary material for: Quantitative Analyses of Schizophrenia-Associated Metabolites in Serum: Serum D-Lactate Levels Are Negatively Correlated with Gamma-Glutamylcysteine in Medicated Schizophrenia Patients
Source: PLoS One. 2014 Jul 8;9(7):e101652. doi: 10.1371/journal.pone.0101652 (PMC4086900; doi:10.1371/journal.pone.0101652)
Supplement: Table S5 — Serum levels of Trp and its metabolites in controls and patients with schizophrenia. (XLS) [file pone.0101652.s009.xls]

## Sheet: p < 0.05
		Table S5.	Serum levels of Trp and its metabolites in controls and patients with schizophrenia.
		Compound					Controls (n = 27)				Schizophrenia patients (n = 25)					p value*
		Tryptophan (μmol/L)				81.3433	±	3.36466		101.025	±	4.48304				0.00101083
		Kynurenine (μmol/L)				1.74111	±	0.121354		2.3488	±	0.161573				0.00567591
		5-Hydroxytryptamine (μmol/L)				0.851196	±	0.0771245		0.609817	±	0.0961314				0.0130777
		Kynurenic acid (nmol/L)				28.7317	±	2.1451		26.4737	±	2.38872
		Only p values below 0.05 (i.e. significant) are included in this table.
		* Non-parametric Mann-Whitney U-test
